# Supplementary material for: Sugar mimics and their probable binding sites: design and synthesis of thiazole linked coumarin-piperazine hybrids as galectin-1 inhibitors
Source: PubMed Central journal article supplement — RSC Adv. 2024 Nov 18;14(49):36794–803. doi: 10.1039/d4ra06715k (PMC11571122; doi:10.1039/d4ra06715k), 2024-11-18
Supplement: RA-014-D4RA06715K-s001.pdf [file RA-014-D4RA06715K-s001.pdf]

## Supporting Information

### **Sugar Mimics and their Probable Binding Site: Design and Synthesis of Thiazole Linked Coumarin-Piperazine Hybrids as Galectin-1 Inhibitors**

Aaftaab Sethi<sup>a,b</sup>, Janish Kumar<sup>c</sup>, Divya Vemula<sup>a</sup>, Divya Gadde<sup>d</sup>, Venu Talla<sup>d</sup>, Insaf A Qureshi<sup>c</sup>, Mallika Alvala<sup>a,e\*</sup>

<sup>a</sup> *Department of Medicinal Chemistry, National Institute of Pharmaceutical Education and Research (NIPER), Hyderabad 500037, India*

<sup>b</sup> *Department of Gene Expression, Institute of Molecular Biology and Biotechnology, Adam Mickiewicz University, Poznan, Poland*

<sup>c</sup> *Department of Biotechnology & Bioinformatics, School of Life Sciences, University of Hyderabad, Hyderabad 500046, India*

<sup>d</sup> *Department of Pharmacology and Toxicology, National Institute of Pharmaceutical Education and Research (NIPER), Hyderabad 500037, India*

<sup>e</sup> *MARS Training Academy, Hyderabad, India*

\*Corresponding Author

E-mail – [mallikaalvala@yahoo.in](mailto:mallikaalvala@yahoo.in) ORCID - 0000-0003-3770-4725 (<https://orcid.org/0000-0003-3770-4725>)

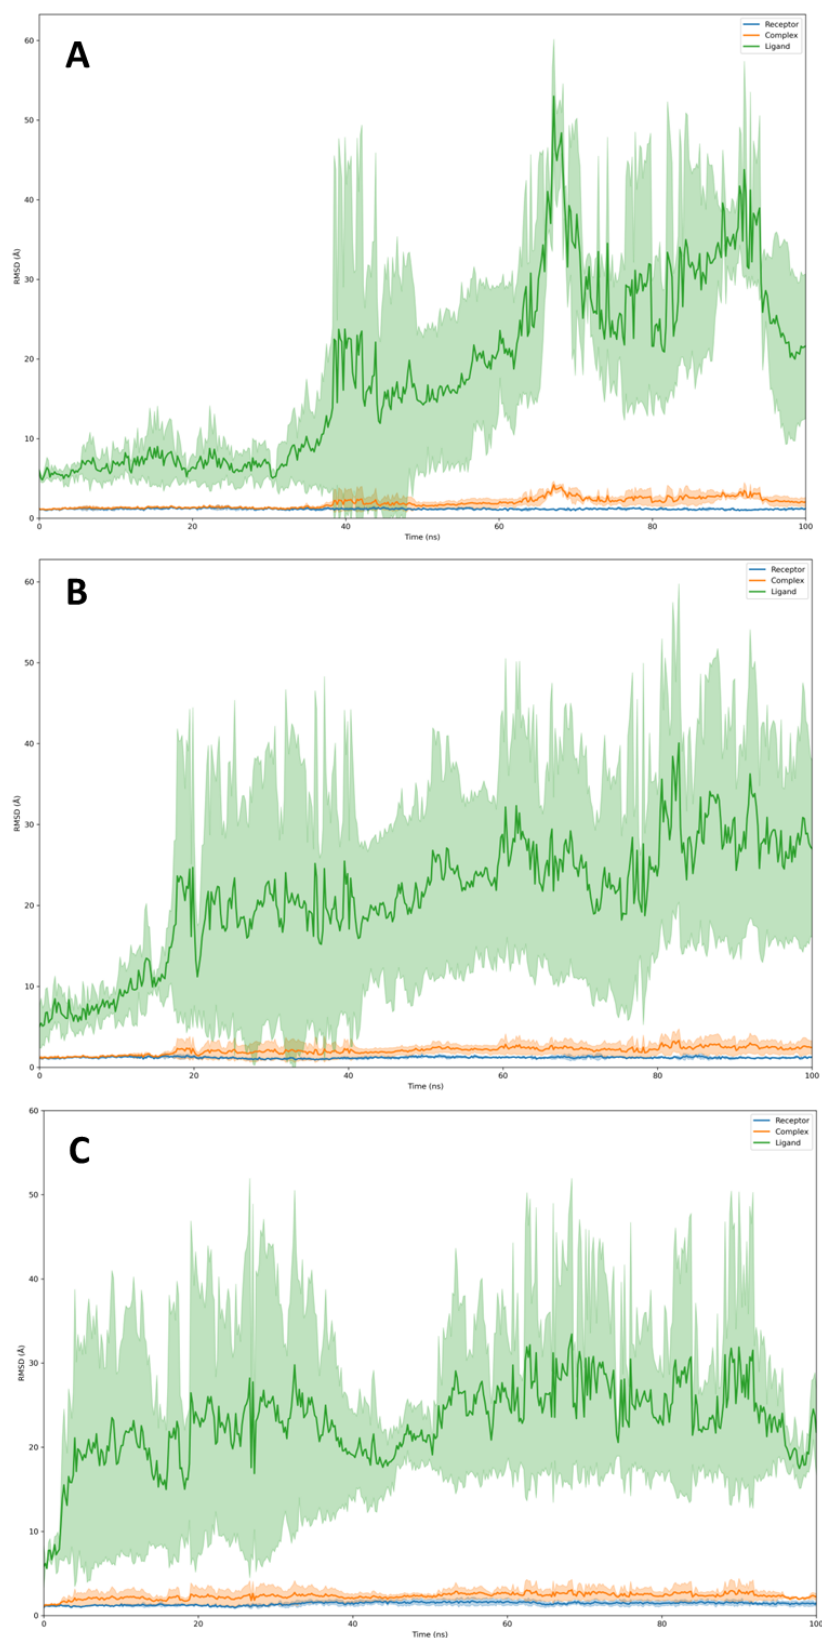

**Figure S1** RMSD of ligand i.e. compound 10g (green), complex (orange) and the receptor (blue) for Pose 1 (A), pose 3 (B) and pose 15 (C) over the course of the simulation. The shaded regions represent the standard deviation of the RMSD values.

COc1ccccc1N(CCN(C(=O)Nc2nc(-c3cc4ccccc4oc3=O)cs2)CC1
[Radar view](#)
[Download as CSV](#)
[Download as PDF](#)

| STRUCTURE                                                                         |  |  | ABSORPTION                                  |        |     | TOXICITY                                                                                                                                                                                                                                                                                                                                                                                                                                                                                                                                                               |       |     |
|-----------------------------------------------------------------------------------|--|--|---------------------------------------------|--------|-----|------------------------------------------------------------------------------------------------------------------------------------------------------------------------------------------------------------------------------------------------------------------------------------------------------------------------------------------------------------------------------------------------------------------------------------------------------------------------------------------------------------------------------------------------------------------------|-------|-----|
| 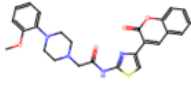 |  |  | Caco-2 Permeability                         | -4.884 | ● ● | HERG Blockers                                                                                                                                                                                                                                                                                                                                                                                                                                                                                                                                                          | 0.941 | ● ● |
|                                                                                   |  |  | MDCK Permeability                           | 0.0    | ● ● | HERG Blockers (10um)                                                                                                                                                                                                                                                                                                                                                                                                                                                                                                                                                   | 0.687 | ● ● |
|                                                                                   |  |  | PAMPA                                       | --     | ● ● | DLI                                                                                                                                                                                                                                                                                                                                                                                                                                                                                                                                                                    | 0.946 | ● ● |
|                                                                                   |  |  | Pgp inhibitor                               | ---    | ● ● | AMES Toxicity                                                                                                                                                                                                                                                                                                                                                                                                                                                                                                                                                          | 0.352 | ● ● |
|                                                                                   |  |  | Pgp substrate                               | ---    | ● ● | Rat Oral Acute Toxicity                                                                                                                                                                                                                                                                                                                                                                                                                                                                                                                                                | 0.826 | ● ● |
|                                                                                   |  |  | HIA                                         | ---    | ● ● | FDAMDD                                                                                                                                                                                                                                                                                                                                                                                                                                                                                                                                                                 | 0.801 | ● ● |
|                                                                                   |  |  | F20%                                        | --     | ● ● | Skin Sensitization                                                                                                                                                                                                                                                                                                                                                                                                                                                                                                                                                     | 0.319 | ● ● |
|                                                                                   |  |  | F30%                                        | ---    | ● ● | Carcinogenicity                                                                                                                                                                                                                                                                                                                                                                                                                                                                                                                                                        | 0.825 | ● ● |
|                                                                                   |  |  | F50%                                        | -      | ● ● | Eye Corrosion                                                                                                                                                                                                                                                                                                                                                                                                                                                                                                                                                          | 0.0   | ● ● |
|                                                                                   |  |  | <b>DISTRIBUTION</b>                         |        |     | Eye Irritation                                                                                                                                                                                                                                                                                                                                                                                                                                                                                                                                                         | 0.002 | ● ● |
|                                                                                   |  |  | PPB                                         | 97.8%  | ● ● | Respiratory                                                                                                                                                                                                                                                                                                                                                                                                                                                                                                                                                            | 0.976 | ● ● |
|                                                                                   |  |  | VDss                                        | 1.408  | ● ● | Human Hepatotoxicity                                                                                                                                                                                                                                                                                                                                                                                                                                                                                                                                                   | 0.767 | ● ● |
|                                                                                   |  |  | BBB                                         | -      | ● ● | Drug-induced Nephrotoxicity                                                                                                                                                                                                                                                                                                                                                                                                                                                                                                                                            | 0.853 | ● ● |
|                                                                                   |  |  | Fu                                          | 1.9%   | ● ● | Drug-induced Neurotoxicity                                                                                                                                                                                                                                                                                                                                                                                                                                                                                                                                             | 0.863 | ● ● |
|                                                                                   |  |  | OATP1B1 inhibitor                           | ++     | ● ● | Ototoxicity                                                                                                                                                                                                                                                                                                                                                                                                                                                                                                                                                            | 0.285 | ● ● |
|                                                                                   |  |  | OATP1B3 inhibitor                           | +++    | ● ● | Hematotoxicity                                                                                                                                                                                                                                                                                                                                                                                                                                                                                                                                                         | 0.146 | ● ● |
|                                                                                   |  |  | BCRP inhibitor                              | ---    | ● ● | Genotoxicity                                                                                                                                                                                                                                                                                                                                                                                                                                                                                                                                                           | 1.0   | ● ● |
|                                                                                   |  |  | MRPI inhibitor                              | +++    | ● ● | RPMI-8226 Immunotoxicity                                                                                                                                                                                                                                                                                                                                                                                                                                                                                                                                               | 0.121 | ● ● |
|                                                                                   |  |  | BSEP inhibitor                              | +++    | ● ● | A549 Cytotoxicity                                                                                                                                                                                                                                                                                                                                                                                                                                                                                                                                                      | 0.128 | ● ● |
|                                                                                   |  |  | <b>METABOLISM</b>                           |        |     | Hek293 Cytotoxicity                                                                                                                                                                                                                                                                                                                                                                                                                                                                                                                                                    | 0.633 | ● ● |
|                                                                                   |  |  | CYP1A2 inhibitor                            | +++    | ● ● | BCF                                                                                                                                                                                                                                                                                                                                                                                                                                                                                                                                                                    | 1.115 | ● ● |
|                                                                                   |  |  | CYP1A2 substrate                            | ---    | ● ● | IGC50                                                                                                                                                                                                                                                                                                                                                                                                                                                                                                                                                                  | 4.103 | ● ● |
|                                                                                   |  |  | CYP2C19 inhibitor                           | +++    | ● ● | LC50DM                                                                                                                                                                                                                                                                                                                                                                                                                                                                                                                                                                 | 5.067 | ● ● |
|                                                                                   |  |  | CYP2C19 substrate                           | +++    | ● ● | LC50FM                                                                                                                                                                                                                                                                                                                                                                                                                                                                                                                                                                 | 4.848 | ● ● |
|                                                                                   |  |  | CYP2C9 inhibitor                            | +++    | ● ● | <b>TOX21 PATHWAY</b>                                                                                                                                                                                                                                                                                                                                                                                                                                                                                                                                                   |       |     |
|                                                                                   |  |  | CYP2C9 substrate                            | +++    | ● ● | NR-AhR                                                                                                                                                                                                                                                                                                                                                                                                                                                                                                                                                                 | ++    | ● ● |
|                                                                                   |  |  | CYP2D6 inhibitor                            | ---    | ● ● | NR-AR                                                                                                                                                                                                                                                                                                                                                                                                                                                                                                                                                                  | --    | ● ● |
|                                                                                   |  |  | CYP2D6 substrate                            | +      | ● ● | NR-AR-LBD                                                                                                                                                                                                                                                                                                                                                                                                                                                                                                                                                              | -     | ● ● |
|                                                                                   |  |  | CYP3A4 inhibitor                            | +++    | ● ● | NR-Aromatase                                                                                                                                                                                                                                                                                                                                                                                                                                                                                                                                                           | --    | ● ● |
|                                                                                   |  |  | CYP3A4 substrate                            | +      | ● ● | NR-ER                                                                                                                                                                                                                                                                                                                                                                                                                                                                                                                                                                  | -     | ● ● |
|                                                                                   |  |  | CYP2B6 inhibitor                            | +++    | ● ● | NR-ER-LBD                                                                                                                                                                                                                                                                                                                                                                                                                                                                                                                                                              | ---   | ● ● |
|                                                                                   |  |  | CYP2B6 substrate                            | ---    | ● ● | NR-PPAR-gamma                                                                                                                                                                                                                                                                                                                                                                                                                                                                                                                                                          | --    | ● ● |
|                                                                                   |  |  | CYP2C8 inhibitor                            | +++    | ● ● | SR-ARE                                                                                                                                                                                                                                                                                                                                                                                                                                                                                                                                                                 | +++   | ● ● |
|                                                                                   |  |  | HLM Stability                               | +++    | ● ● | SR-ATAD5                                                                                                                                                                                                                                                                                                                                                                                                                                                                                                                                                               | +     | ● ● |
|                                                                                   |  |  | <b>EXCRETION</b>                            |        |     | SR-HSE                                                                                                                                                                                                                                                                                                                                                                                                                                                                                                                                                                 | --    | ● ● |
|                                                                                   |  |  | CL <sub>plasma</sub>                        | 4.228  | ● ● | SR-MMP                                                                                                                                                                                                                                                                                                                                                                                                                                                                                                                                                                 | --    | ● ● |
|                                                                                   |  |  | T1/2                                        | 0.423  | ● ● | SR-p53                                                                                                                                                                                                                                                                                                                                                                                                                                                                                                                                                                 | +     | ● ● |
|                                                                                   |  |  | <b>TOXICOPHORE RULES</b>                    |        |     | <p><b>ⓘ Tips:</b></p> <ul style="list-style-type: none"> <li>For the classification endpoints, the prediction probability values are transformed into six symbols: 0-0.1 (---), 0.1-0.3 (--), 0.3-0.5 (-), 0.5-0.7 (+), 0.7-0.9 (++), and 0.9-1.0 (+++).</li> <li>Additionally, the corresponding relationships of the three labels are as follows: ● excellent; ● medium; ● poor;</li> </ul> <p><b>ⓘ Disclaimer:</b></p> <ul style="list-style-type: none"> <li>These resources are free to use but should not be used for medical or professional advice.</li> </ul> |       |     |
|                                                                                   |  |  | Acute Aquatic Toxicity Rule                 | 0      | ● ● |                                                                                                                                                                                                                                                                                                                                                                                                                                                                                                                                                                        |       |     |
|                                                                                   |  |  | Genotoxic Carcinogenicity Mutagenicity Rule | 2      | ▲ ● |                                                                                                                                                                                                                                                                                                                                                                                                                                                                                                                                                                        |       |     |
|                                                                                   |  |  | NonGenotoxic Carcinogenicity Rule           | 0      | ● ● |                                                                                                                                                                                                                                                                                                                                                                                                                                                                                                                                                                        |       |     |
|                                                                                   |  |  | Skin Sensitization Rule                     | 4      | ▲ ● |                                                                                                                                                                                                                                                                                                                                                                                                                                                                                                                                                                        |       |     |
|                                                                                   |  |  | Aquatic Toxicity Rule                       | 1      | ▲ ● |                                                                                                                                                                                                                                                                                                                                                                                                                                                                                                                                                                        |       |     |
|                                                                                   |  |  | NonBiodegradable                            | 0      | ● ● |                                                                                                                                                                                                                                                                                                                                                                                                                                                                                                                                                                        |       |     |
|                                                                                   |  |  | SureChEMBL Rule                             | 1      | ▲ ● |                                                                                                                                                                                                                                                                                                                                                                                                                                                                                                                                                                        |       |     |
|                                                                                   |  |  | FAF-Drugs4 Rule                             | 4      | ▲ ● |                                                                                                                                                                                                                                                                                                                                                                                                                                                                                                                                                                        |       |     |
|                                                                                   |  |  | FAF-Drugs4 Rule                             | 4      | ▲ ● |                                                                                                                                                                                                                                                                                                                                                                                                                                                                                                                                                                        |       |     |
|                                                                                   |  |  | FAF-Drugs4 Rule                             | 4      | ▲ ● |                                                                                                                                                                                                                                                                                                                                                                                                                                                                                                                                                                        |       |     |

Figure S2 Predicted ADMET values for compound 10g using ADMETLab 3.0.

## Molecule Depiction

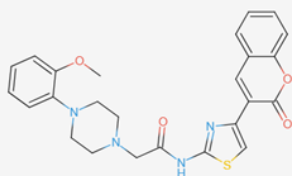

SMILES

## Molecule properties:

| Descriptor       | Value   |
|------------------|---------|
| Molecular Weight | 476.558 |
| LogP             | 3.6858  |
| #Rotatable Bonds | 6       |
| #Acceptors       | 8       |
| #Donors          | 1       |
| Surface Area     | 199.947 |

| Property     | Model Name                        | Predicted Value | Unit                                        |
|--------------|-----------------------------------|-----------------|---------------------------------------------|
| Absorption   | Water solubility                  | -4.23           | Numeric (log mol/L)                         |
| Absorption   | Caco2 permeability                | 1.035           | Numeric (log Papp in 10 <sup>-6</sup> cm/s) |
| Absorption   | Intestinal absorption (human)     | 94.154          | Numeric (% Absorbed)                        |
| Absorption   | Skin Permeability                 | -2.74           | Numeric (log Kp)                            |
| Absorption   | P-glycoprotein substrate          | Yes             | Categorical (Yes/No)                        |
| Absorption   | P-glycoprotein I inhibitor        | Yes             | Categorical (Yes/No)                        |
| Absorption   | P-glycoprotein II inhibitor       | Yes             | Categorical (Yes/No)                        |
| Distribution | VDss (human)                      | 0.626           | Numeric (log L/kg)                          |
| Distribution | Fraction unbound (human)          | 0.09            | Numeric (Fu)                                |
| Distribution | BBB permeability                  | -1.119          | Numeric (log BB)                            |
| Distribution | CNS permeability                  | -2.238          | Numeric (log PS)                            |
| Metabolism   | CYP2D6 substrate                  | Yes             | Categorical (Yes/No)                        |
| Metabolism   | CYP3A4 substrate                  | Yes             | Categorical (Yes/No)                        |
| Metabolism   | CYP1A2 inhibitor                  | No              | Categorical (Yes/No)                        |
| Metabolism   | CYP2C19 inhibitor                 | No              | Categorical (Yes/No)                        |
| Metabolism   | CYP2C9 inhibitor                  | No              | Categorical (Yes/No)                        |
| Metabolism   | CYP2D6 inhibitor                  | No              | Categorical (Yes/No)                        |
| Metabolism   | CYP3A4 inhibitor                  | Yes             | Categorical (Yes/No)                        |
| Excretion    | Total Clearance                   | 0.639           | Numeric (log ml/min/kg)                     |
| Excretion    | Renal OCT2 substrate              | Yes             | Categorical (Yes/No)                        |
| Toxicity     | AMES toxicity                     | No              | Categorical (Yes/No)                        |
| Toxicity     | Max. tolerated dose (human)       | 0.241           | Numeric (log mg/kg/day)                     |
| Toxicity     | hERG I inhibitor                  | No              | Categorical (Yes/No)                        |
| Toxicity     | hERG II inhibitor                 | Yes             | Categorical (Yes/No)                        |
| Toxicity     | Oral Rat Acute Toxicity (LD50)    | 2.4             | Numeric (mol/kg)                            |
| Toxicity     | Oral Rat Chronic Toxicity (LOAEL) | 1.034           | Numeric (log mg/kg_bw/day)                  |
| Toxicity     | Hepatotoxicity                    | Yes             | Categorical (Yes/No)                        |
| Toxicity     | Skin Sensitisation                | No              | Categorical (Yes/No)                        |
| Toxicity     | <i>T.Pyriformis</i> toxicity      | 0.315           | Numeric (log ug/L)                          |
| Toxicity     | Minnow toxicity                   | 2.103           | Numeric (log mM)                            |

[Run another prediction](#)
[Back](#)

Figure S3 Predicted ADMET values for compound 10g using pkCSM.

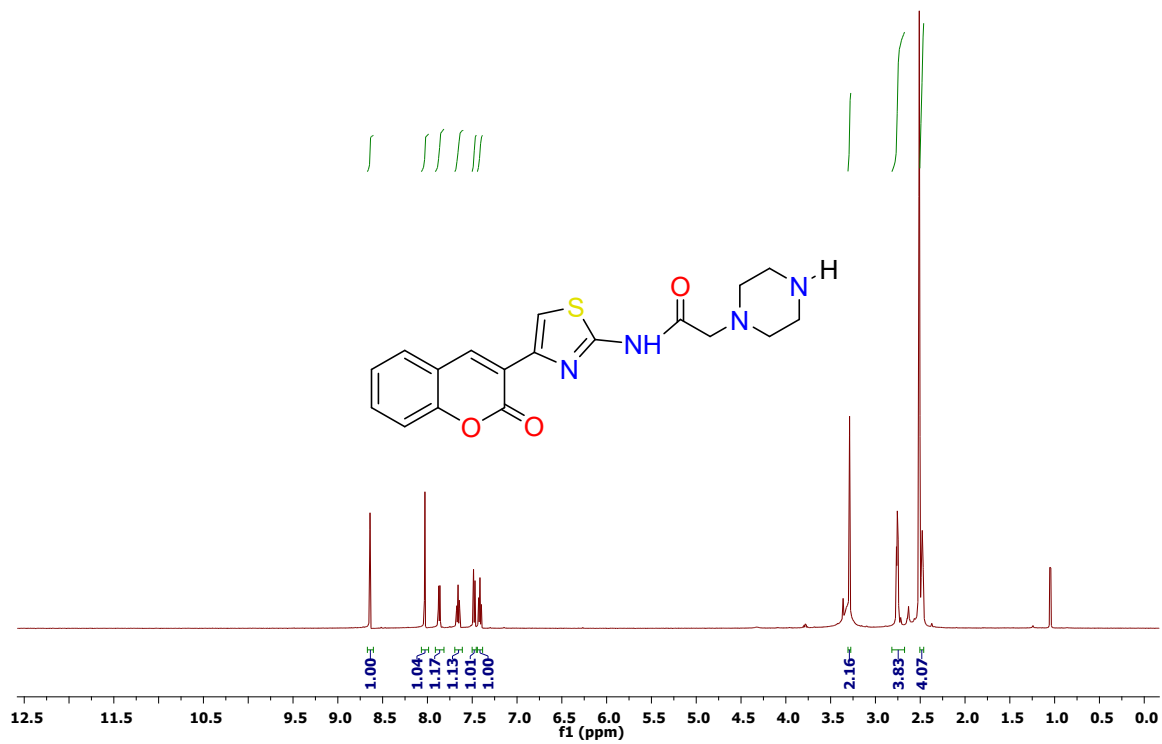

$^1\text{H NMR}$  (500 MHz,  $\text{DMSO-}d_6$ ) spectrum of compound 10a

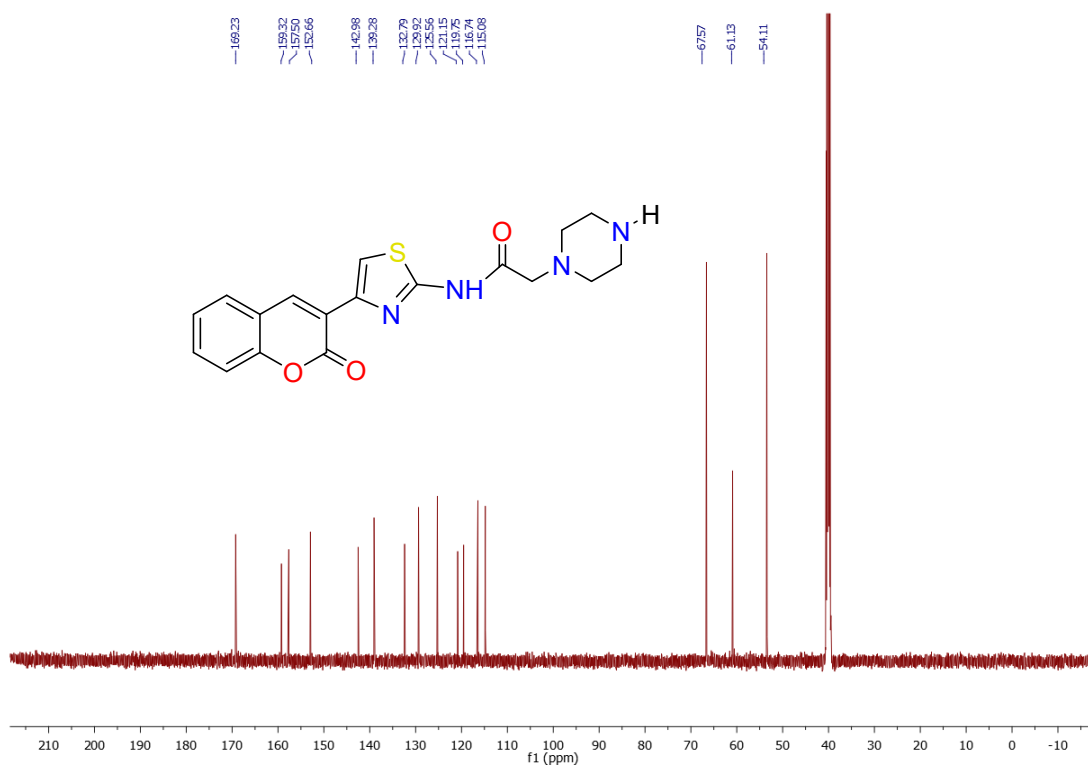

$^{13}\text{C NMR}$  (125 MHz,  $\text{DMSO-}d_6$ ) spectrum of compound 10a

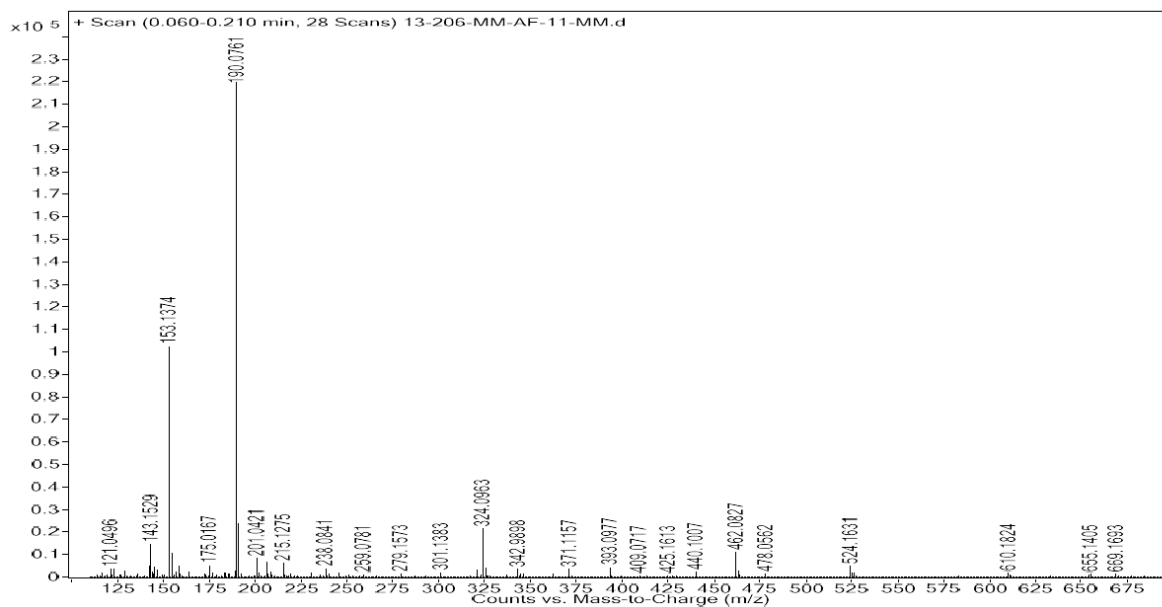

HRMS of compound 10a

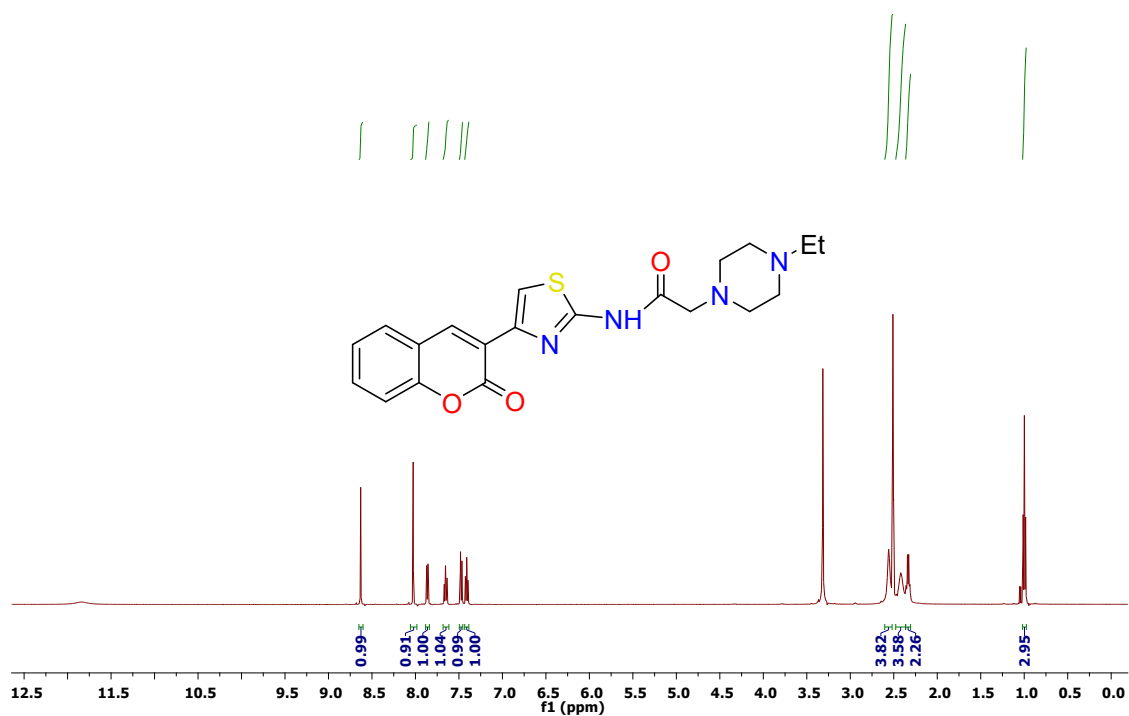

$^1\text{H}$  NMR (500 MHz,  $\text{DMSO-}d_6$ ) spectrum of compound 10b

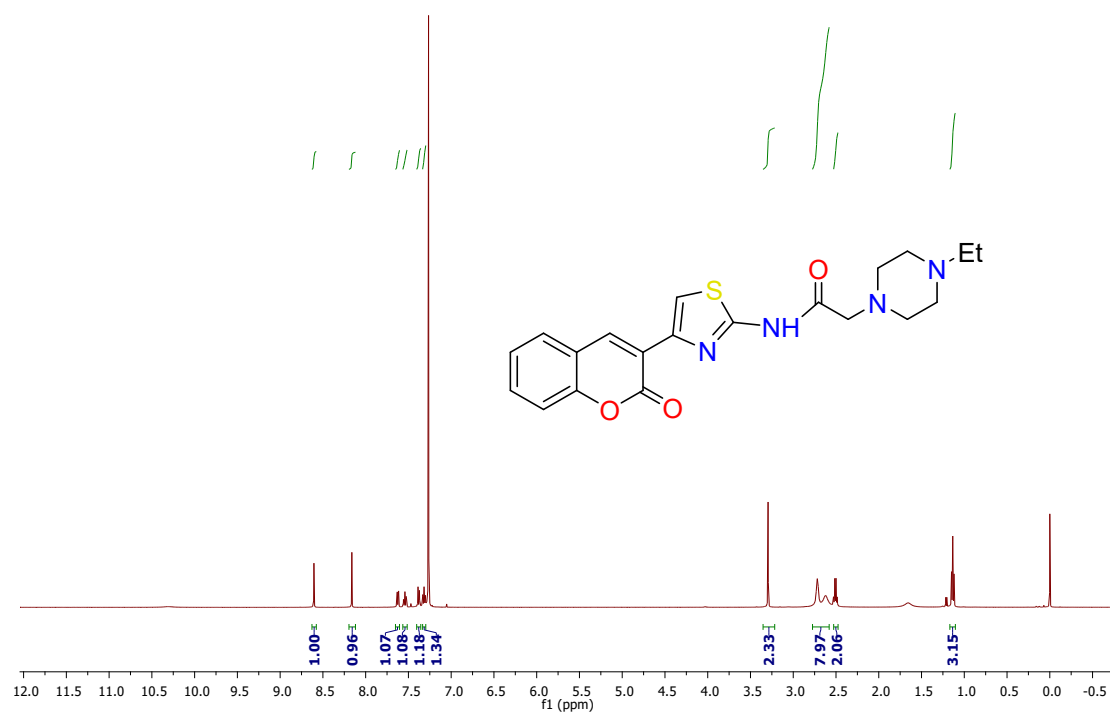

<sup>1</sup>H NMR (500 MHz, CDCl<sub>3</sub>) spectrum of compound **10b** - Carried out to identify missing CH<sub>2</sub> protons which had overlapped with moisture peak ( $\delta$  3.33) in DMSO solvent

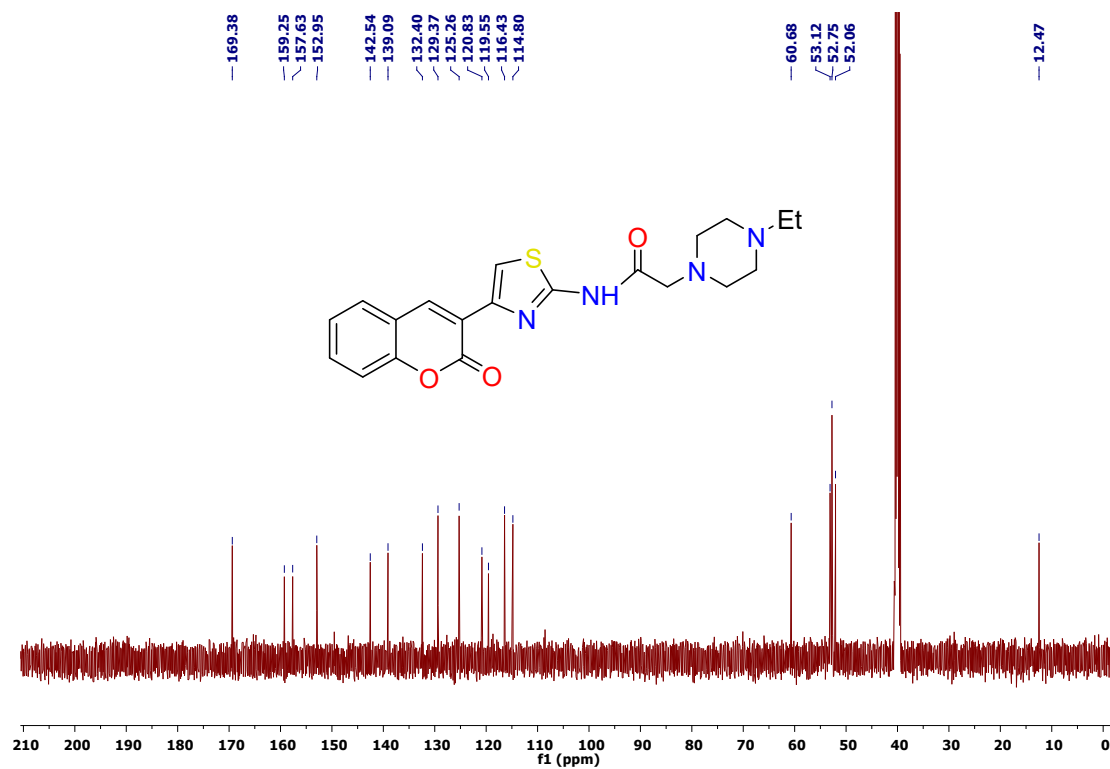

<sup>13</sup>C NMR (125 MHz, DMSO-*d*<sub>6</sub>) spectrum of compound **10b**

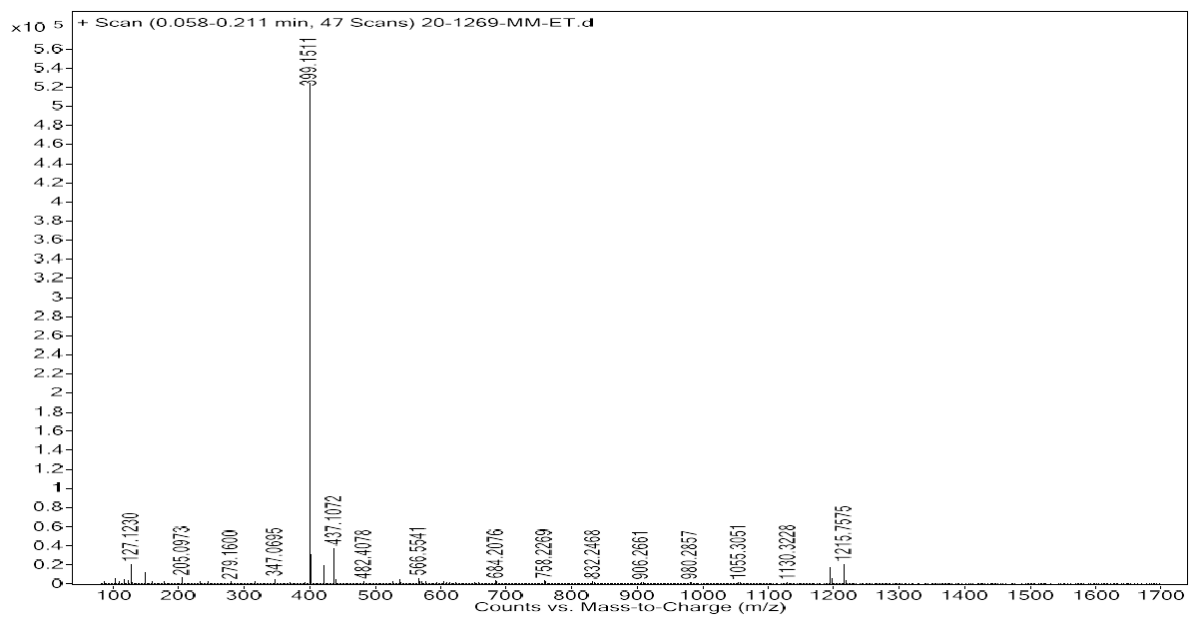

HRMS of compound **10b**

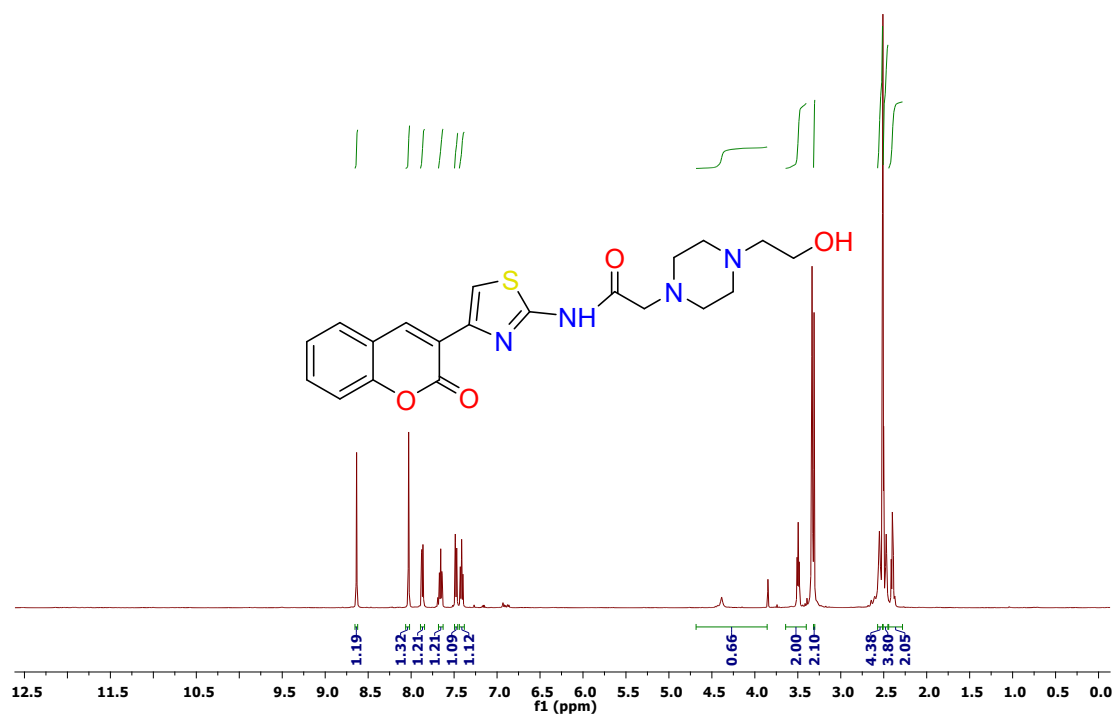

<sup>1</sup>H NMR (500 MHz, DMSO-*d*<sub>6</sub>) spectrum of compound **10c**



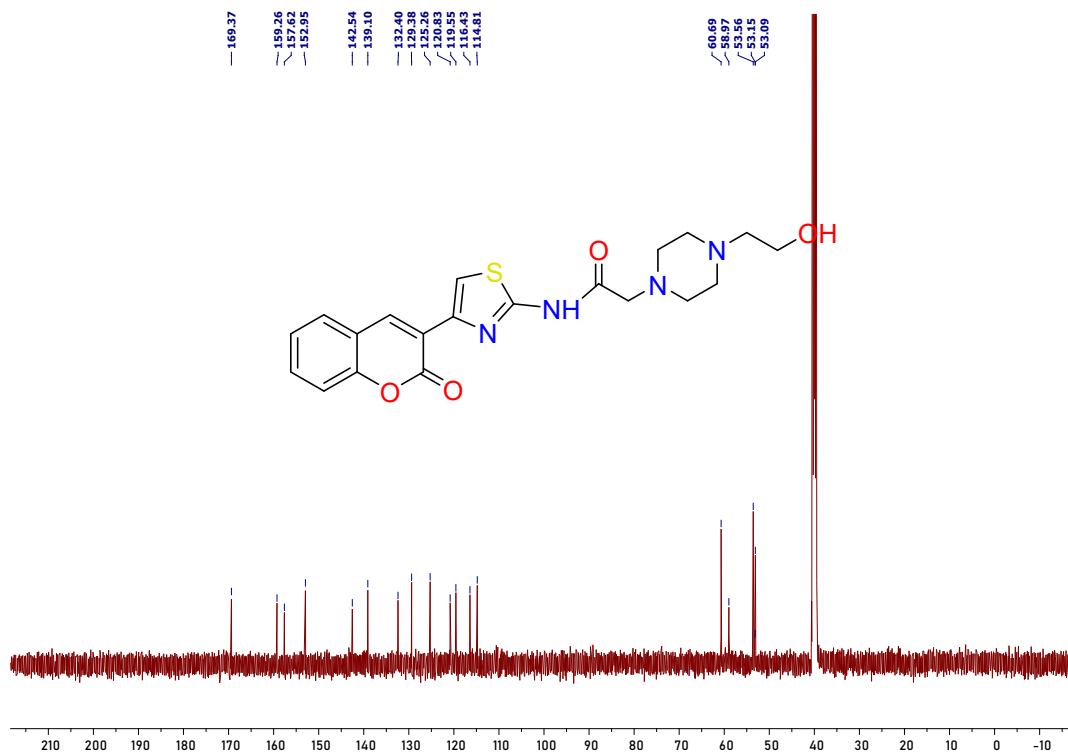

<sup>13</sup>C NMR (125 MHz, DMSO-*d*<sub>6</sub>) spectrum of compound 10c

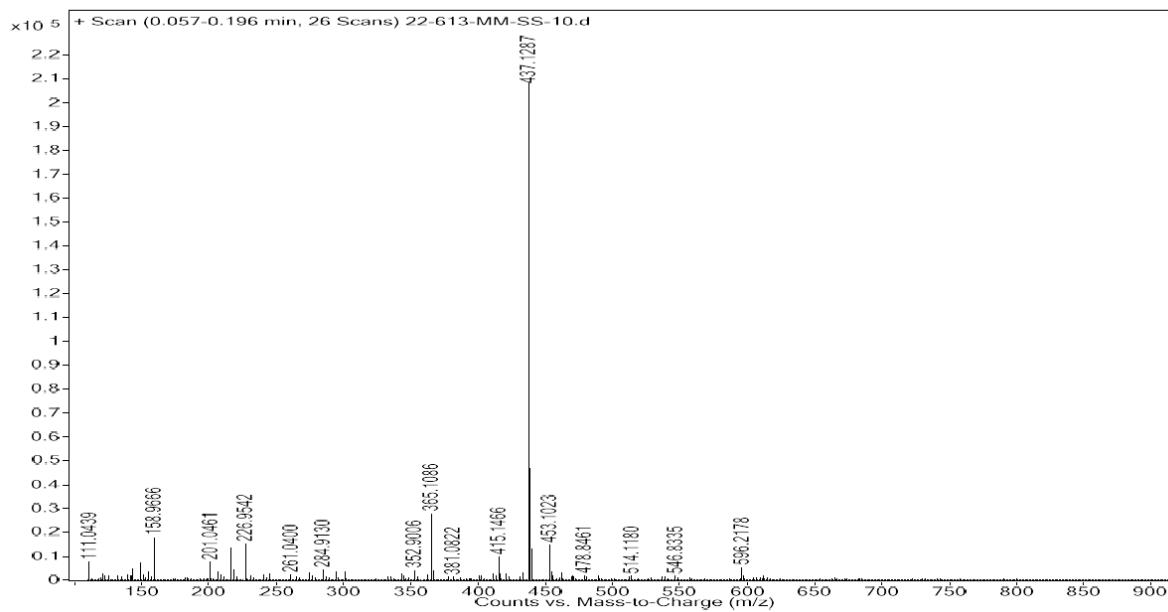

HRMS of compound 10c

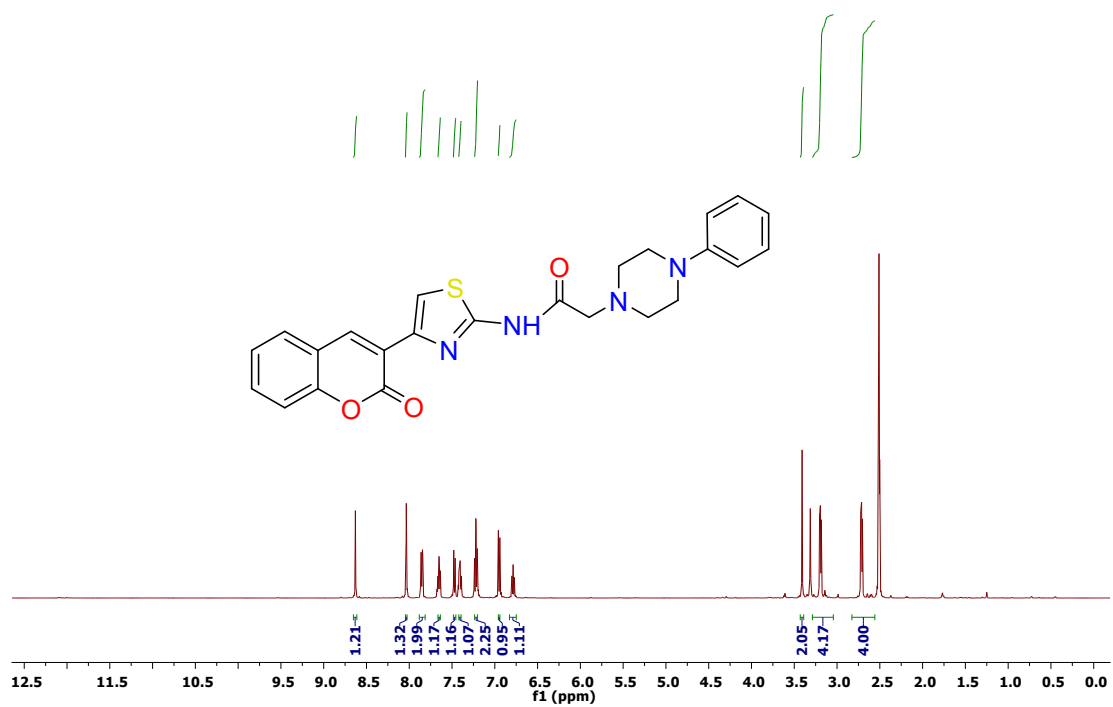

<sup>1</sup>H NMR (500 MHz, DMSO-*d*<sub>6</sub>) spectrum of compound 10d

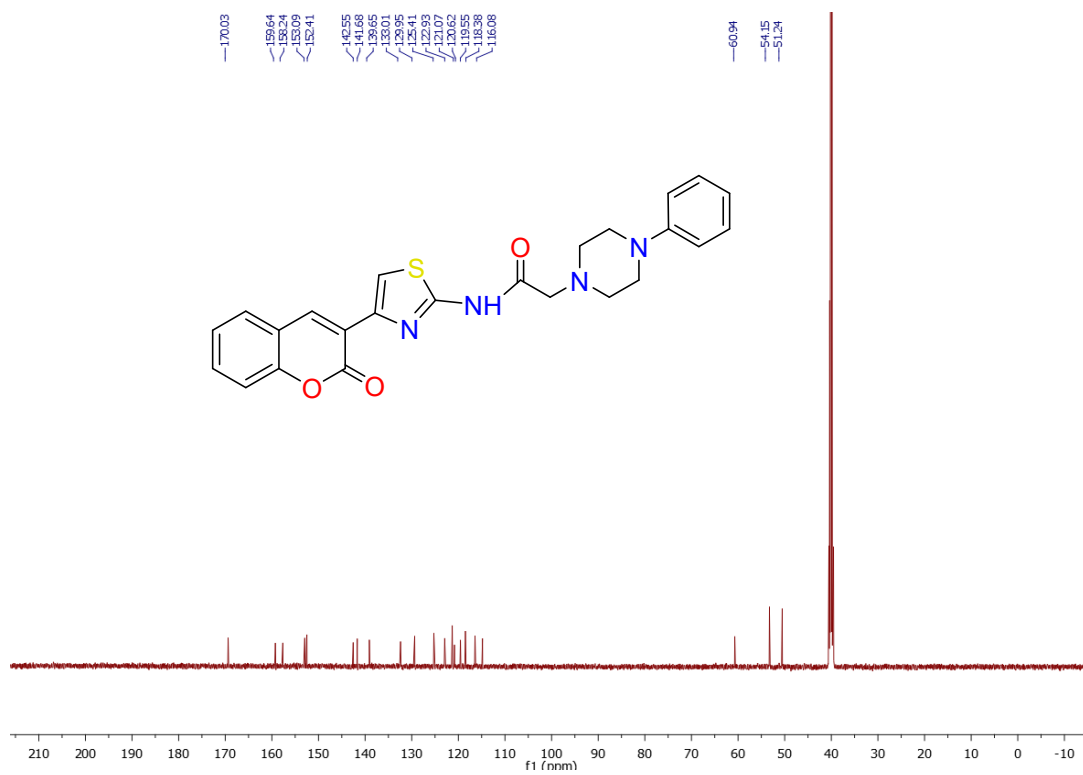

<sup>13</sup>C NMR (125 MHz, DMSO-*d*<sub>6</sub>) spectrum of compound 10d

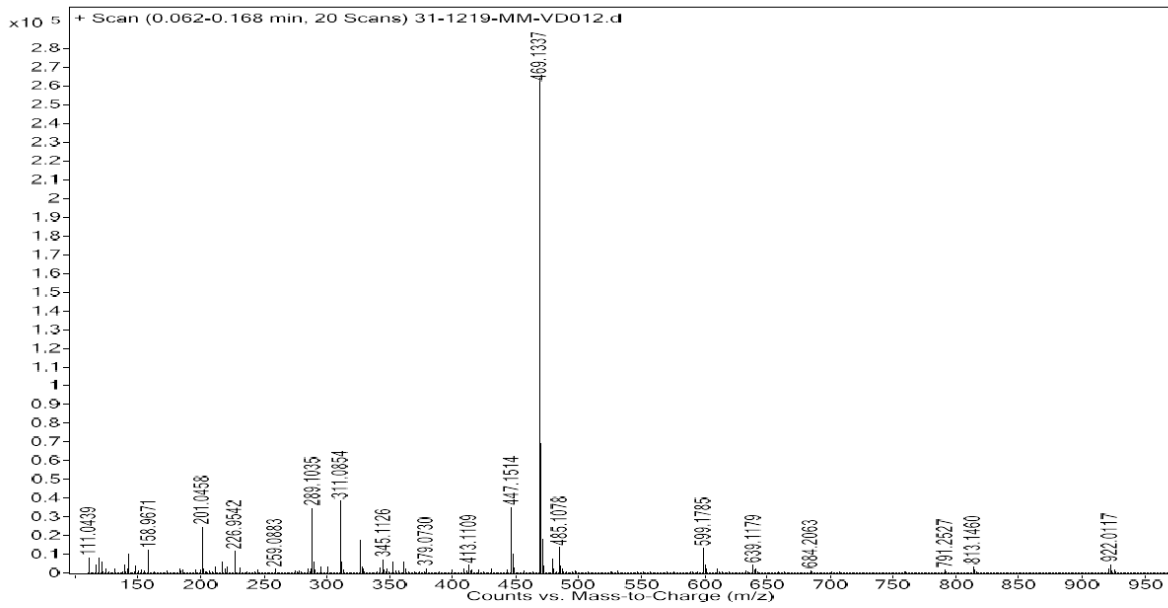

HRMS of compound **10d**

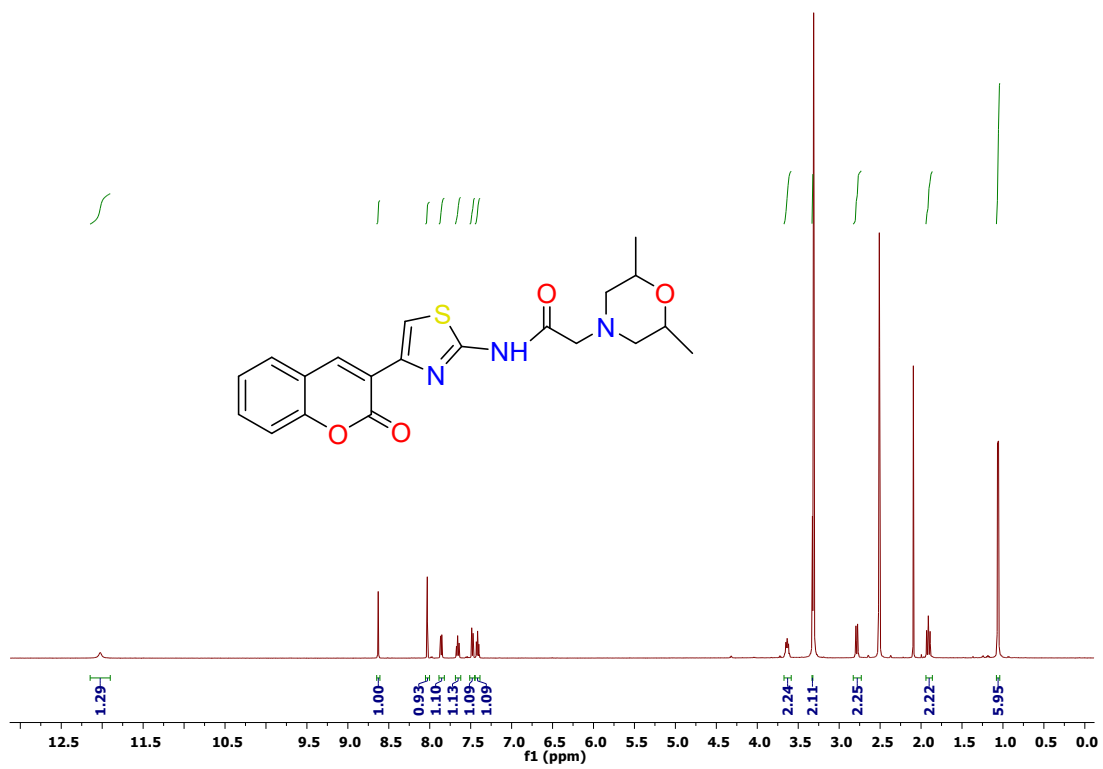

<sup>1</sup>H NMR (500 MHz, DMSO-*d*<sub>6</sub>) spectrum of compound **10e**

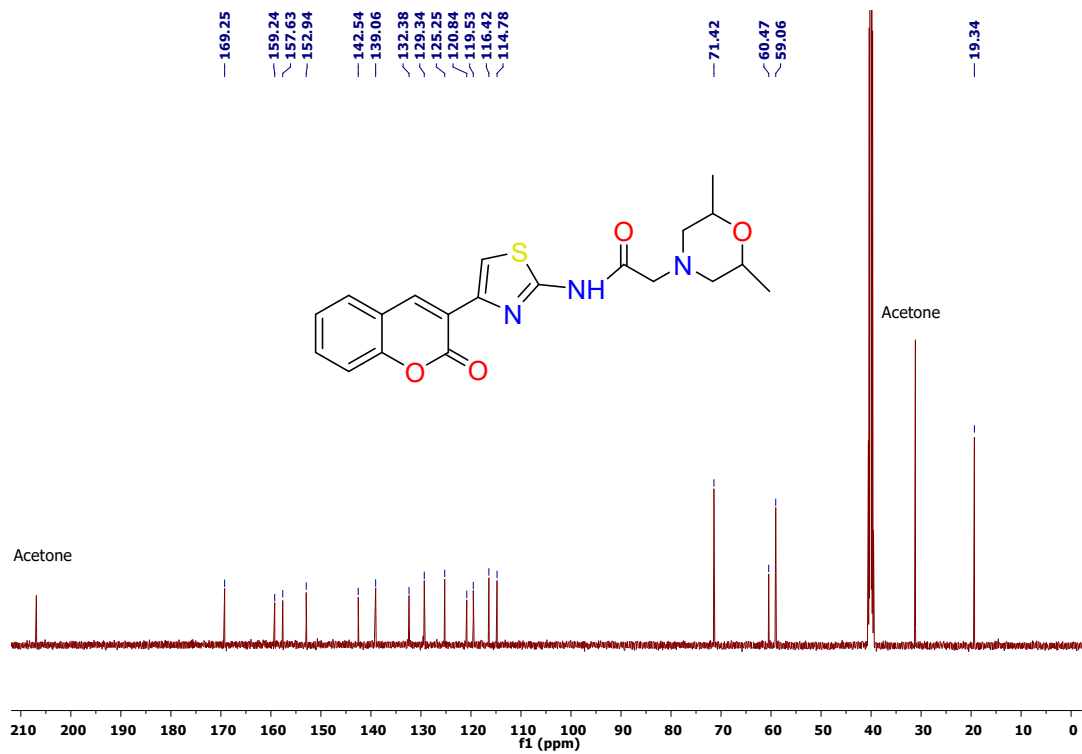

<sup>13</sup>C NMR (125 MHz, DMSO-*d*<sub>6</sub>) spectrum of compound 10e

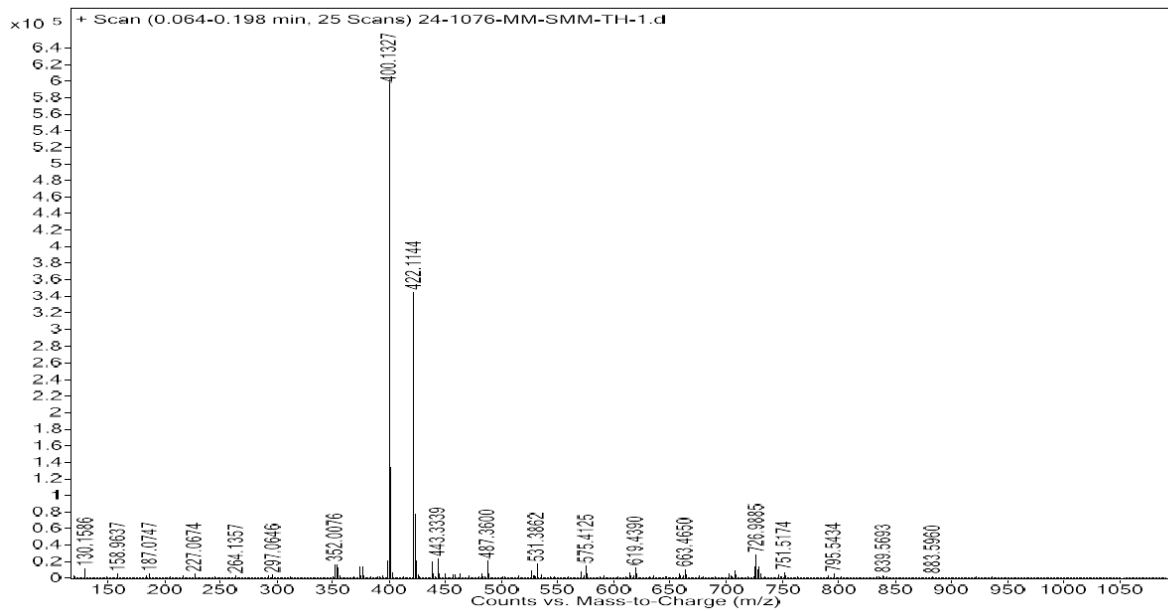

HRMS of compound 10e

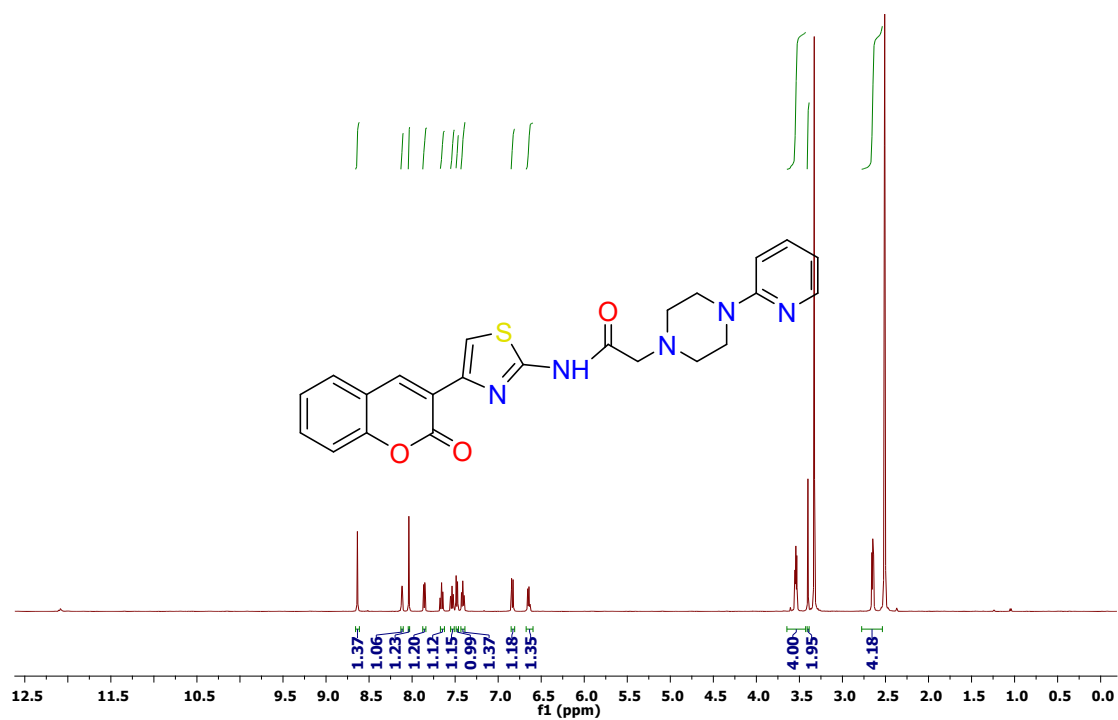

<sup>1</sup>H NMR (500 MHz, DMSO-*d*<sub>6</sub>) spectrum of compound **10f**

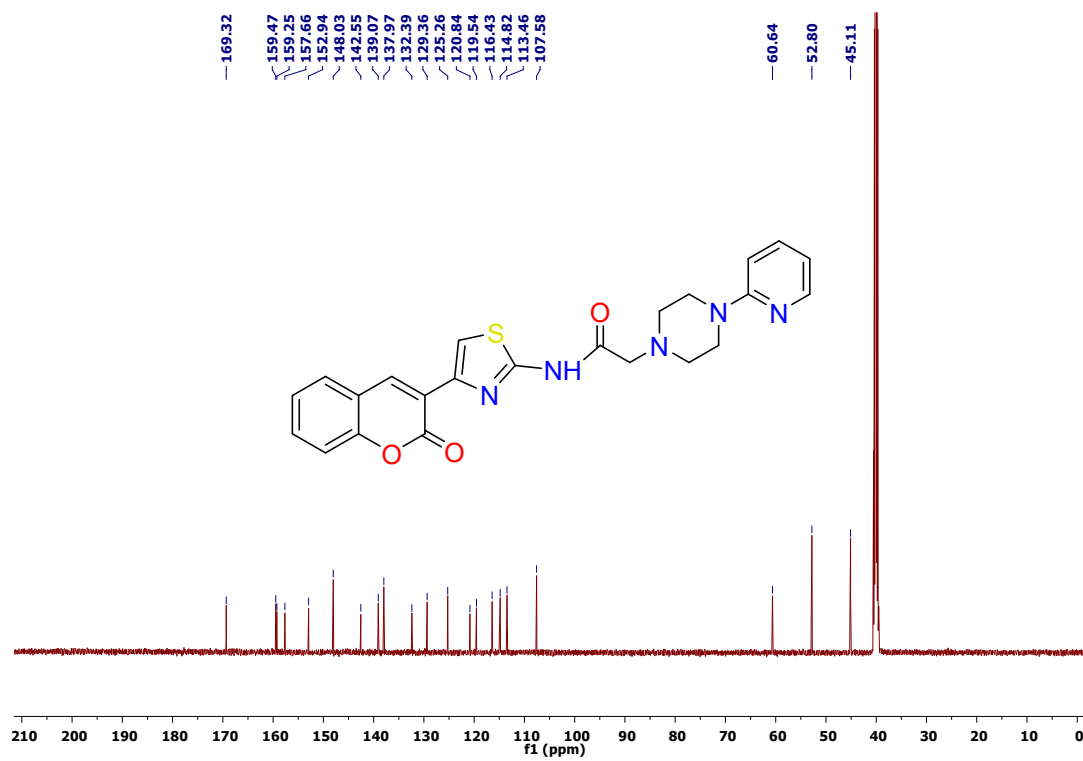

<sup>13</sup>C NMR (125 MHz, DMSO-*d*<sub>6</sub>) spectrum of compound **10f**

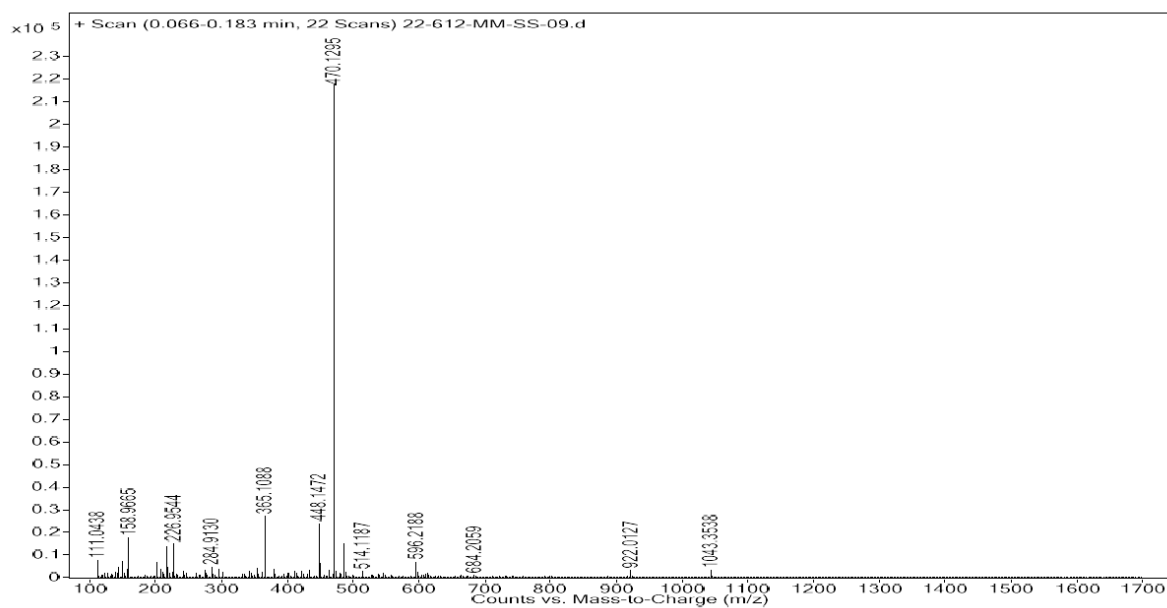

HRMS of compound **10f**

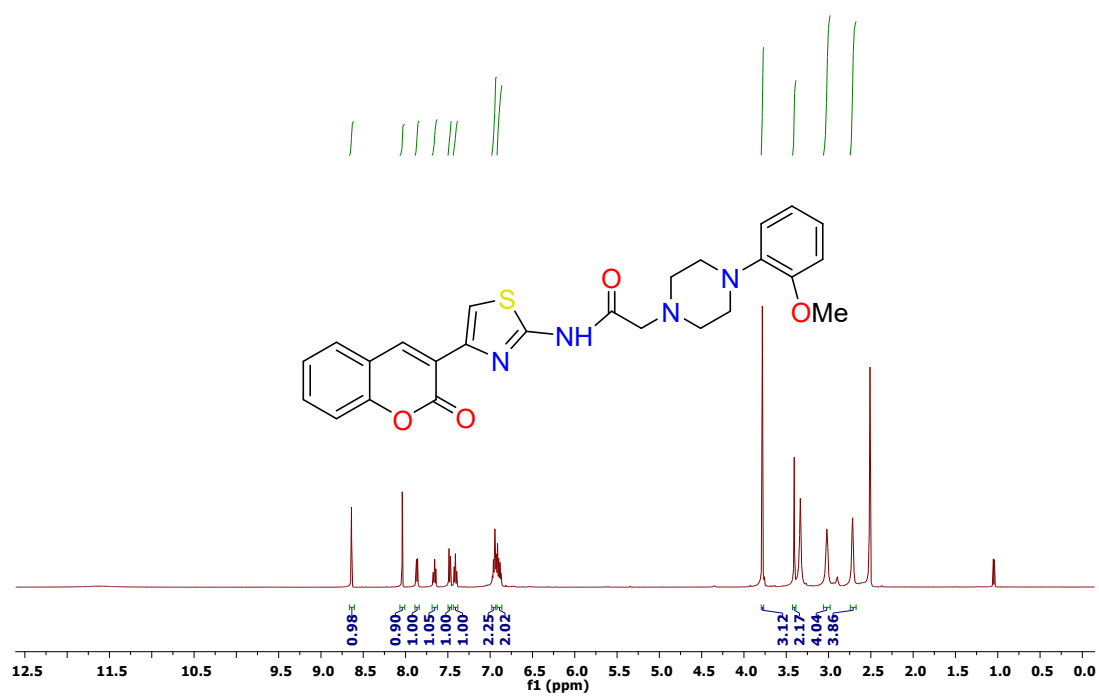

<sup>1</sup>H NMR (500 MHz, DMSO-*d*<sub>6</sub>) spectrum of compound **10g**

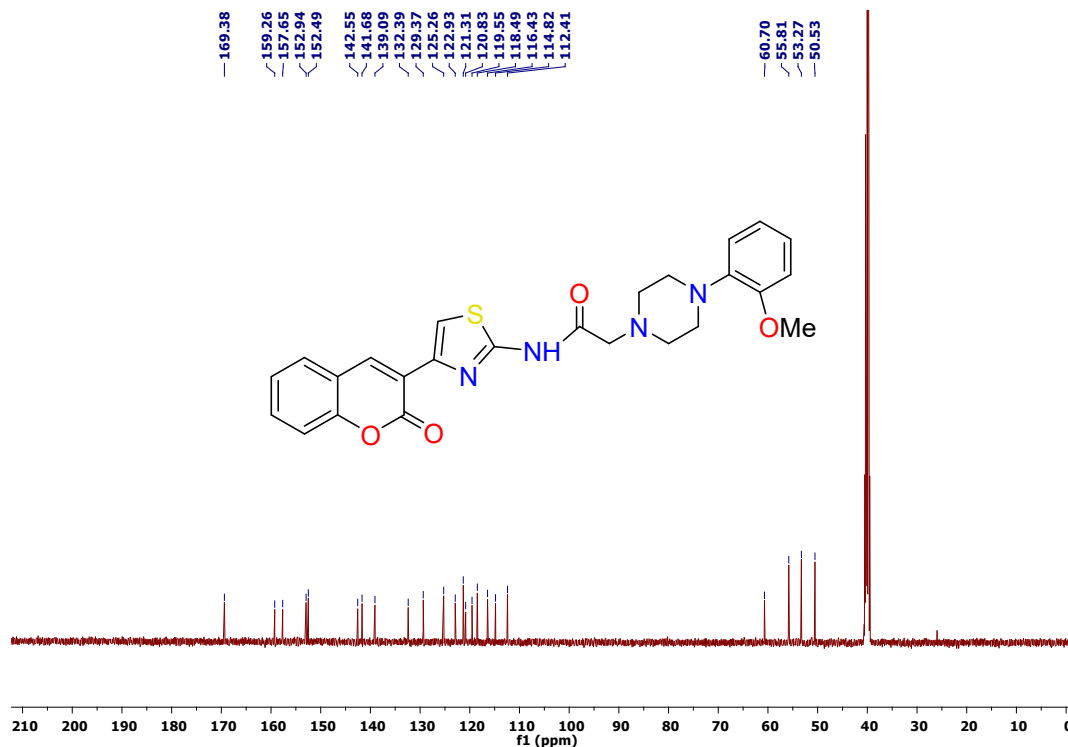

<sup>13</sup>C NMR (125 MHz, DMSO-*d*<sub>6</sub>) spectrum of compound 10g

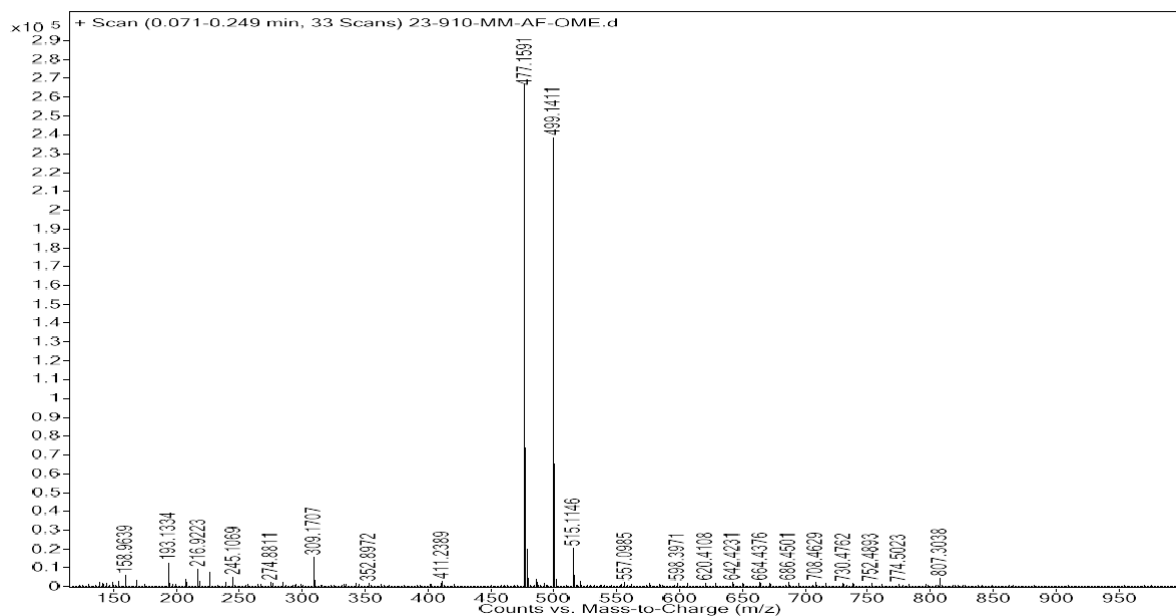

HRMS of compound 10g

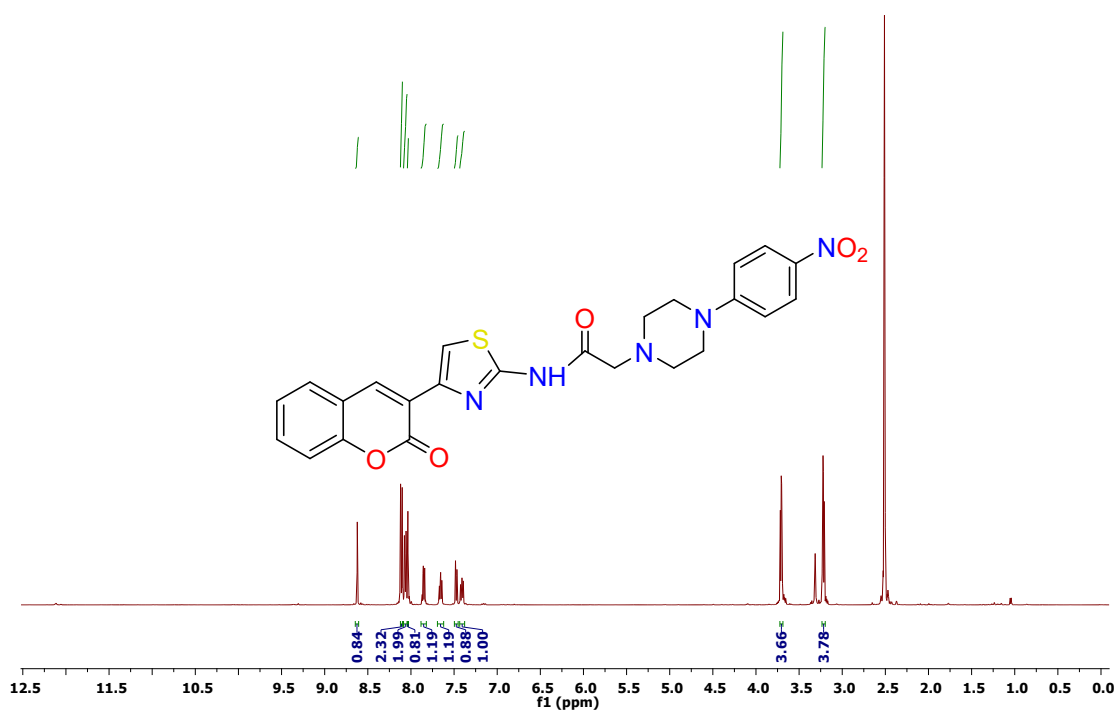

<sup>1</sup>H NMR (500 MHz, DMSO-*d*<sub>6</sub>) spectrum of compound 10h

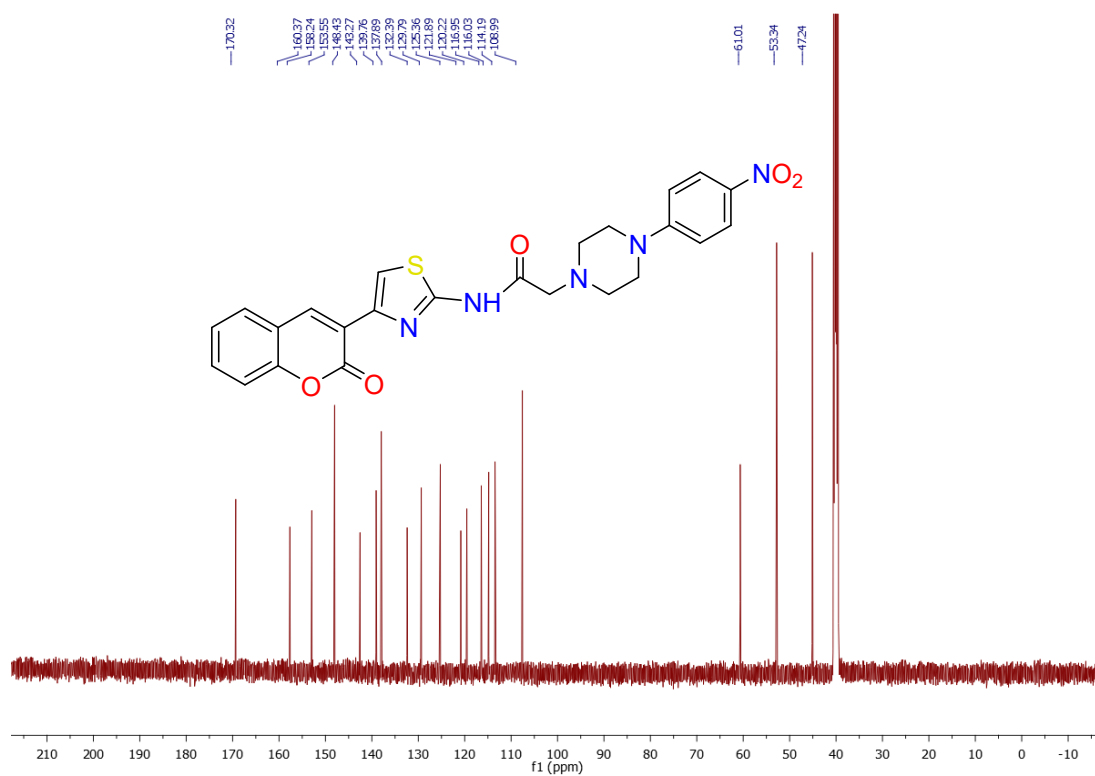

<sup>13</sup>C NMR (125 MHz, DMSO-*d*<sub>6</sub>) spectrum of compound 10h



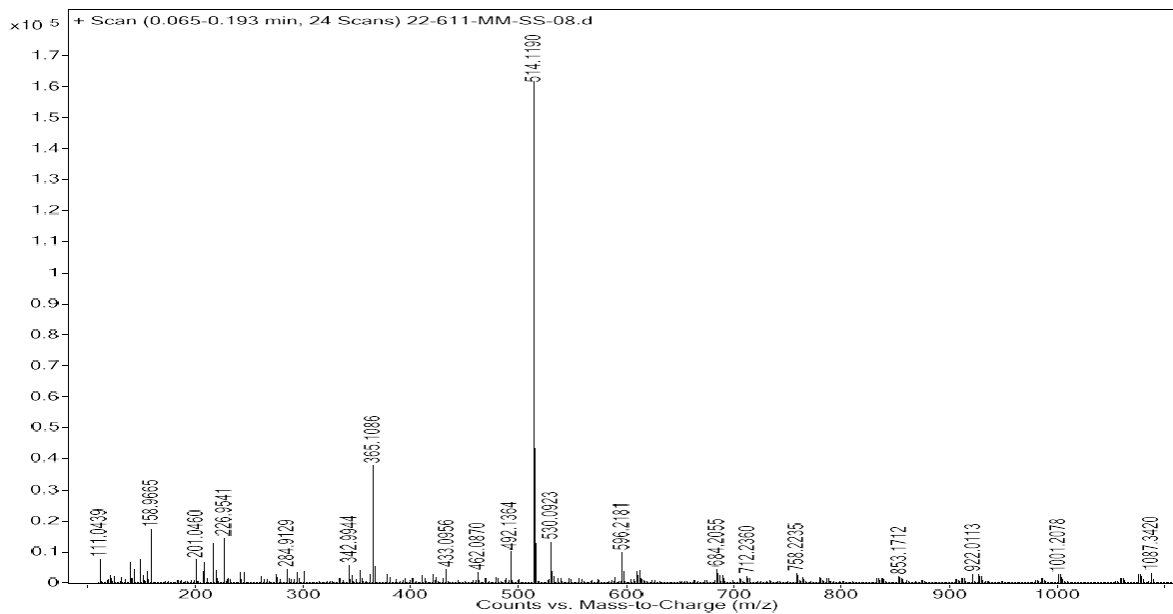

HRMS of compound 10h

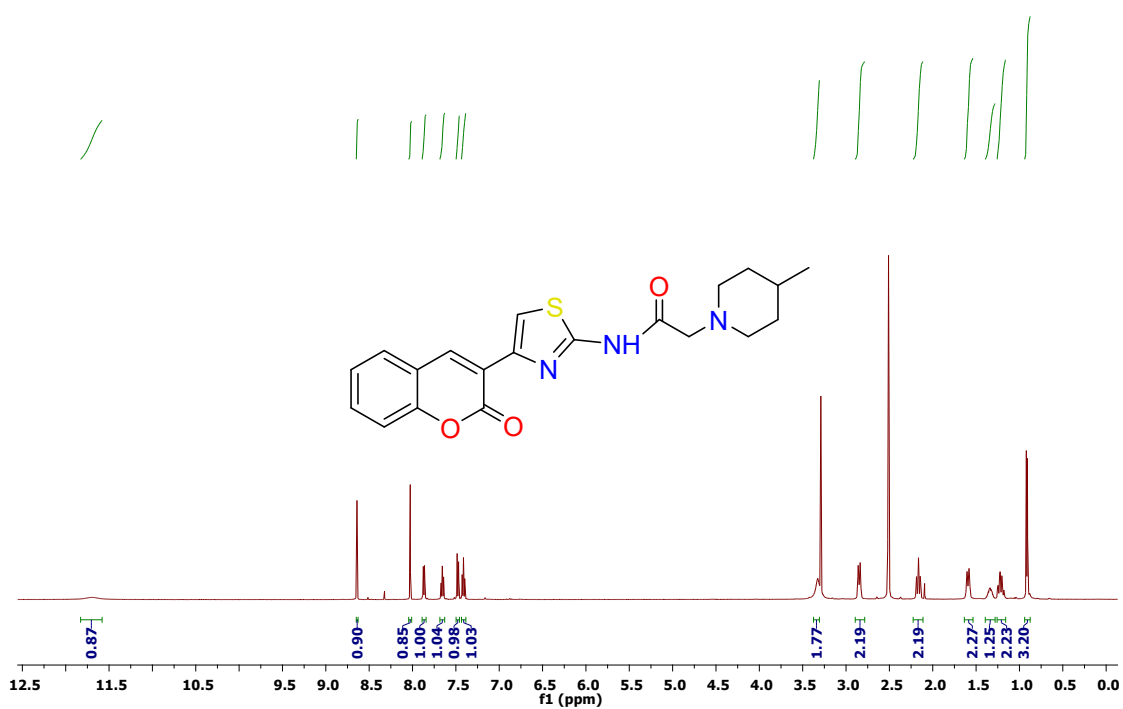

<sup>1</sup>H NMR (500 MHz, DMSO-*d*<sub>6</sub>) spectrum of compound 10i

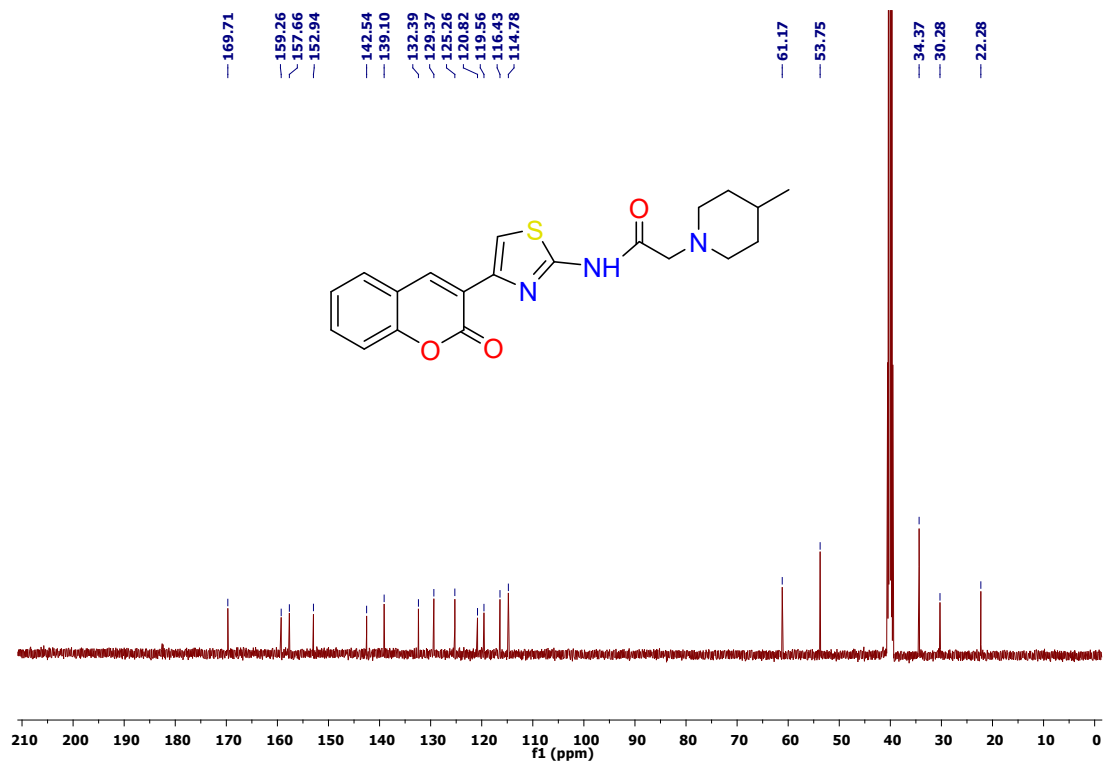

<sup>13</sup>C NMR (125 MHz, DMSO-*d*<sub>6</sub>) spectrum of compound 10i

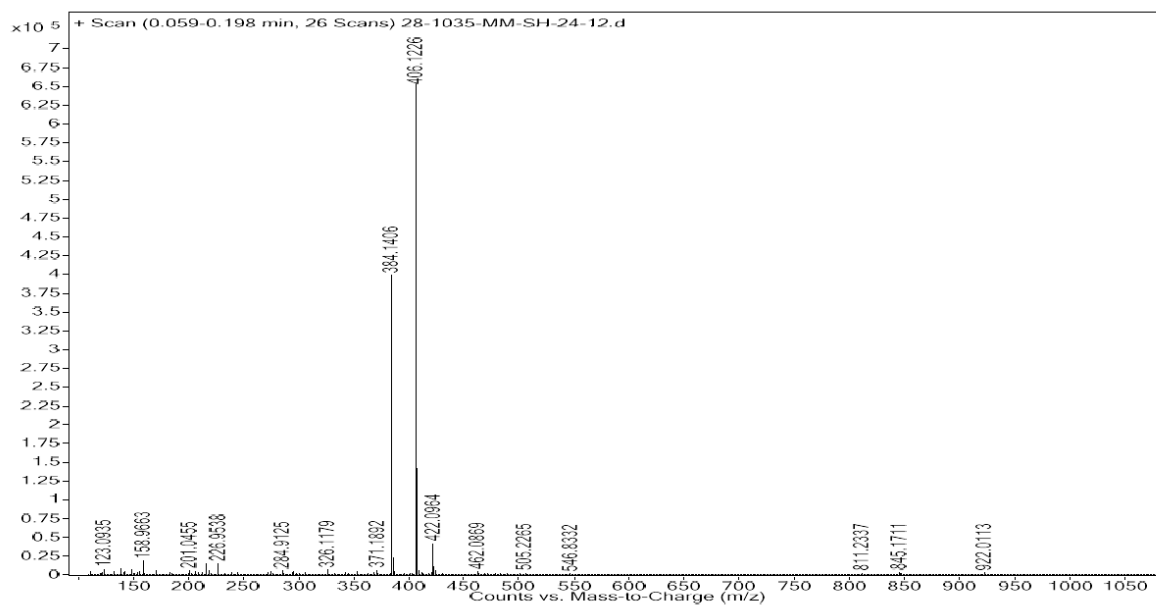

HRMS of compound 10i
